# Supplementary material for: Increased apomixis expression concurrent with genetic and epigenetic variation in a newly synthesized Eragrostis curvula polyploid
Source: PubMed Central journal article supplement — Sci Rep. 2014 Apr 8;4:4423. doi: 10.1038/srep04423 (PMC3978503; doi:10.1038/srep04423), 2014-04-08
Supplement: srep04423-s2.pdf [file srep04423-s2.pdf]

**Increased apomixis expression concurrent with genetic and epigenetic variation  
in a newly synthesized *Eragrostis curvula* polyploid**

Diego C. Zappacosta<sup>1,2</sup>, Ana C. Ochogavía<sup>3</sup>, Juan M. Rodrigo<sup>2</sup>, José R. Romero<sup>2</sup>,  
Mauro S. Meier<sup>2</sup>, Ingrid Garbus<sup>1</sup>, Silvina C. Pessino<sup>3</sup> & Viviana C. Echenique<sup>1,2,\*</sup>

<sup>1</sup>Departamento de Agronomía, Universidad Nacional del Sur, 8000 Bahía Blanca, Argentina; <sup>2</sup>CERZOS-CONICET, CCT-Bahía Blanca, 8000 Bahía Blanca, Argentina; <sup>3</sup>Facultad de Ciencias Agrarias, Universidad Nacional de Rosario, 2000 Rosario, Argentina.

HM5-E40

HM5-E36

HM6-E36

T<sub>1M</sub> T<sub>1H</sub> C<sub>1M</sub> C<sub>1H</sub> M<sub>1M</sub> M<sub>1H</sub> T<sub>2M</sub> T<sub>2H</sub> C<sub>2M</sub> C<sub>2H</sub> M<sub>2M</sub> M<sub>2H</sub> NTC T<sub>1M</sub> T<sub>1H</sub> C<sub>1M</sub> C<sub>1H</sub> M<sub>1M</sub> M<sub>1H</sub> T<sub>2M</sub> T<sub>2H</sub> C<sub>2M</sub> C<sub>2H</sub> M<sub>2M</sub> M<sub>2H</sub> NTC T<sub>1M</sub> T<sub>1H</sub> C<sub>1M</sub> C<sub>1H</sub> M<sub>1M</sub> M<sub>1H</sub> T<sub>2M</sub> T<sub>2H</sub> C<sub>2M</sub> C<sub>2H</sub> M<sub>2M</sub> M<sub>2H</sub> NTC

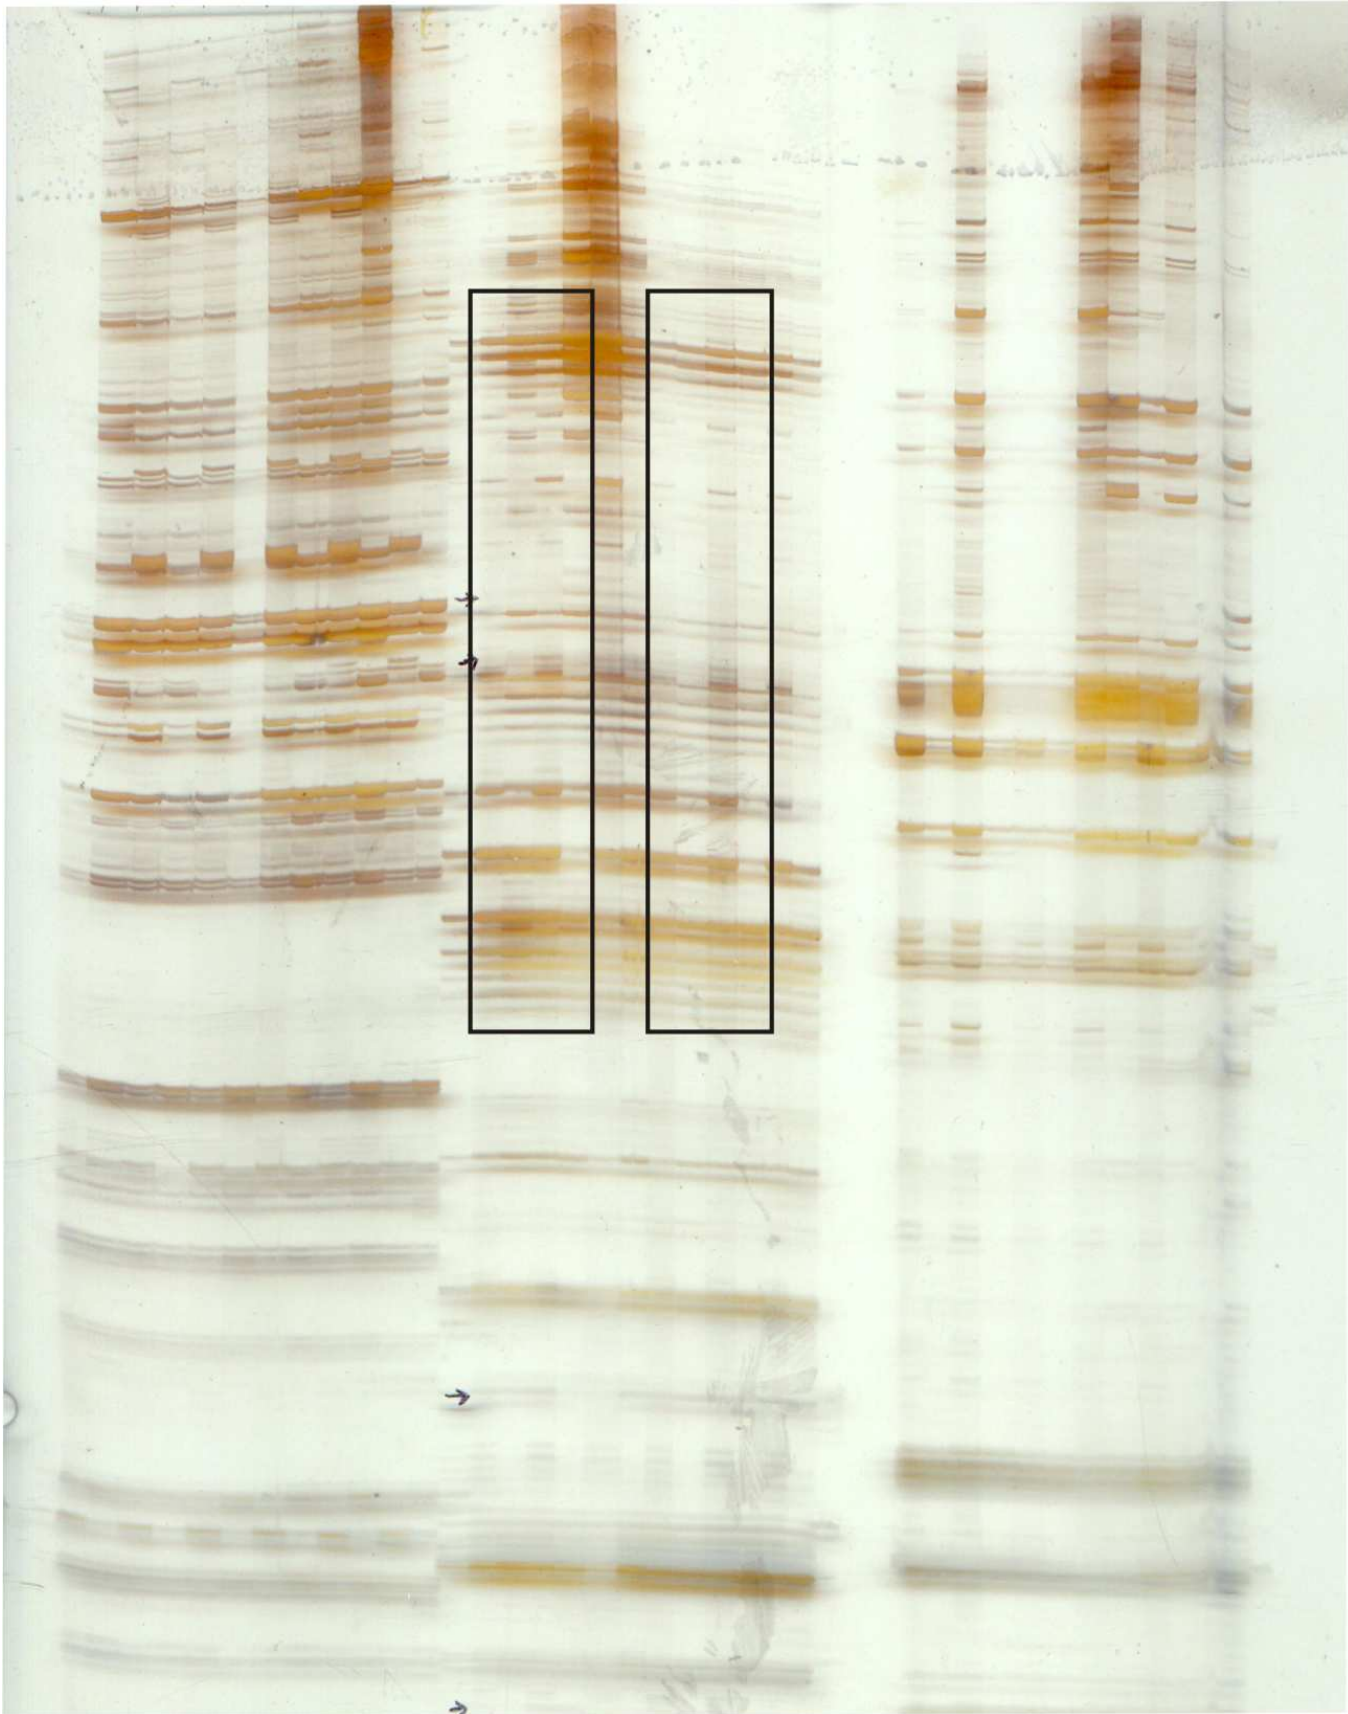

**Supplementary Figure F1. Original MSAP Gel showing amplifications derived from primer pairs HM5=E40, HM5=E36 and HM6=E36.** Gel sectors shown in Fig. 4 were indicated with boxes. A second colchiploid plant (M) was also amplified, but it was discarded for further analysis, since 2003 genomic DNA was degraded. T<sub>1M</sub>: Plant T, year 2003, MspI; T<sub>1H</sub>: Plant T, year 2003, HpaII. C<sub>1M</sub>: Plant C, year 2003, MspI; C<sub>1H</sub>: Plant C, year 2003, HpaII; M<sub>1M</sub>: Plant M, year 2003, MspI; M<sub>1H</sub>: Plant M, year 2003, HpaII; T<sub>2M</sub>: Plant T, year 2007, MspI; T<sub>2H</sub>: Plant T, year 2007, HpaII. C<sub>2M</sub>: Plant C, year 2007, MspI; C<sub>2H</sub>: Plant C, year 2007, HpaII; M<sub>2M</sub>: Plant M, year 2007, MspI; M<sub>2H</sub>: Plant M, year 2007, HpaII; NTC: non-template control.

E33-M37

E36-M37

E33-M33

E36-M36

E36-M39

E33-M38

E36-M38

T<sub>1</sub> C<sub>1</sub> M<sub>1</sub> T<sub>2</sub> C<sub>2</sub> M<sub>2</sub> T<sub>1</sub> C<sub>1</sub> M<sub>1</sub> T<sub>2</sub> C<sub>2</sub> M<sub>2</sub> T<sub>1</sub> C<sub>1</sub> M<sub>1</sub> T<sub>2</sub> C<sub>2</sub> M<sub>2</sub> T<sub>1</sub> C<sub>1</sub> M<sub>1</sub> T<sub>2</sub> C<sub>2</sub> M<sub>2</sub>T<sub>1</sub> C<sub>1</sub> M<sub>1</sub> T<sub>2</sub> C<sub>2</sub> M<sub>2</sub> T<sub>1</sub> C<sub>1</sub> M<sub>1</sub> T<sub>2</sub> C<sub>2</sub> M<sub>2</sub> T<sub>1</sub> C<sub>1</sub> M<sub>1</sub> T<sub>2</sub> C<sub>2</sub> M<sub>2</sub>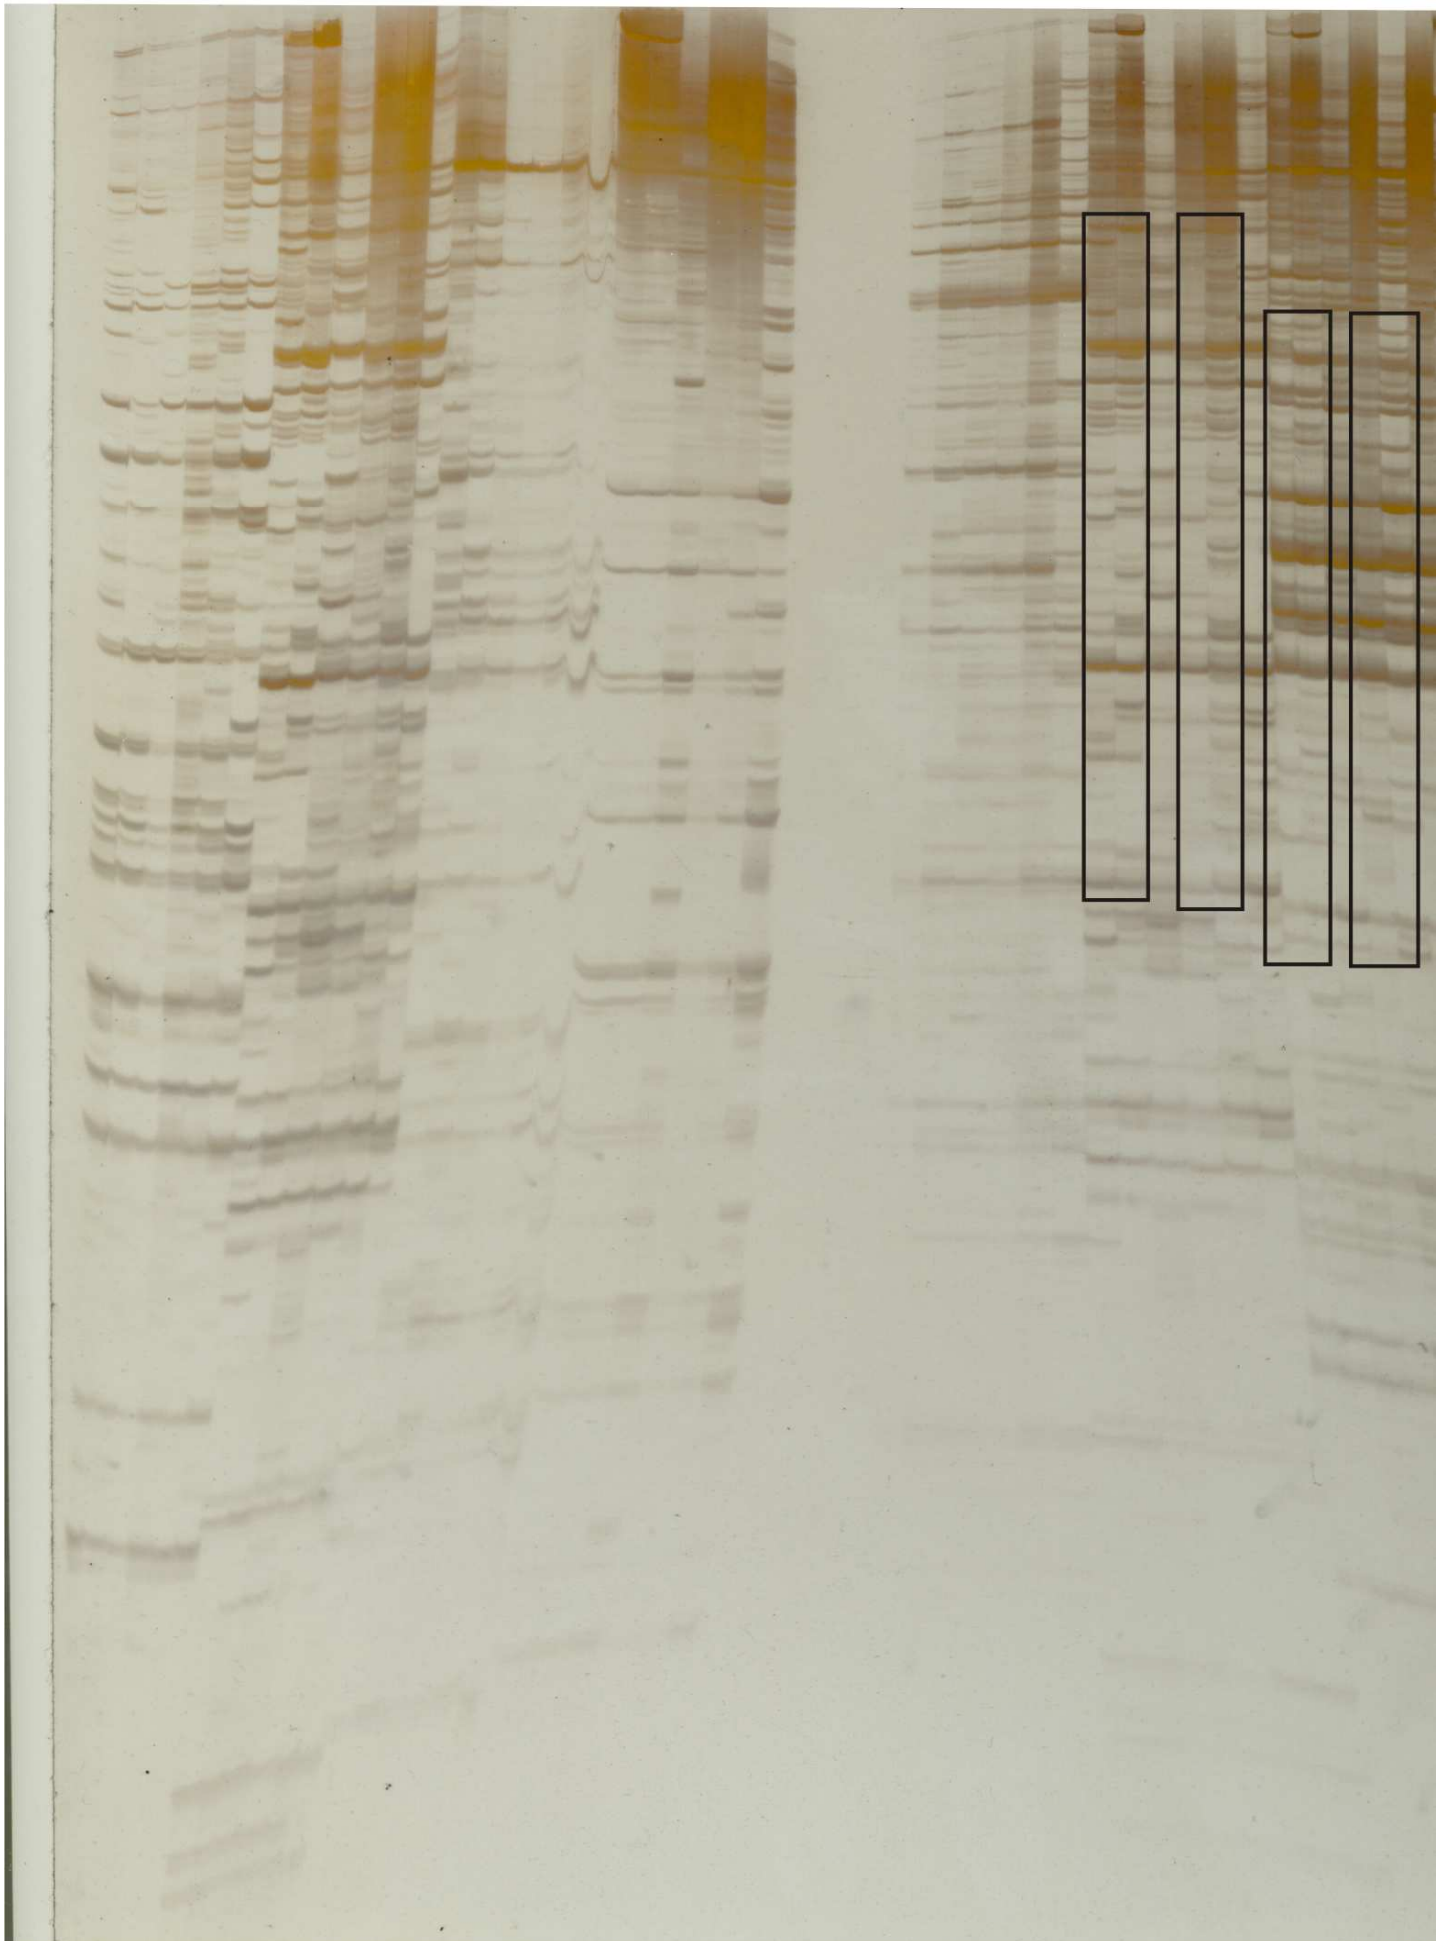

**Supplementary Figure F2. Original AFLP gel showing amplifications derived from primer pairs E33-M37, E36-M37, E33-M33, E36-M36, E36-M39, E33-M38, E36-M38.** Gel sectors shown in Fig. 4 were indicated with boxes. A second colchiploid plant (M) was also amplified, but it was discarded for further analysis, since 2003 genomic DNA was degraded. T<sub>1</sub>: Plant T, year 2003; C<sub>1</sub>: Plant C, year 2003, M<sub>1</sub>: Plant M, year 2003. T<sub>2</sub>: Plant T, year 2007; C<sub>2</sub>: Plant C, year 2007, M<sub>2</sub>: Plant M, year 2007.
